# Supplementary material for: Negative pressure wound therapy for massive subcutaneous emphysema: a systematic review and case series
Source: PubMed Central journal article supplement — J Thorac Dis. 2022 Jan;14(1):43–53. doi: 10.21037/jtd-21-1483 (PMC8828515; doi:10.21037/jtd-21-1483), 2022-01
Supplement: jtd-14-01-43-dss.pdf [file jtd-14-01-43-dss.pdf]

## Data Sharing Statement

|                     |                                                                                                                                                    |                                                                  |
|---------------------|----------------------------------------------------------------------------------------------------------------------------------------------------|------------------------------------------------------------------|
| <b>Article Info</b> | <a href="https://dx.doi.org/10.21037/jtd-21-1483">https://dx.doi.org/10.21037/jtd-21-1483</a>                                                      |                                                                  |
| <b>Item</b>         | <b>Question</b>                                                                                                                                    | <b>Authors' Response<br/>(place "-" if not applicable)</b>       |
| 1                   | Would you like to share data collected for your study to others?                                                                                   | Yes                                                              |
| 2                   | If not, would you like to share the reason for your decision?                                                                                      | -                                                                |
| 3                   | What data in particular will be shared?                                                                                                            | Other clinical data upon request                                 |
| 4                   | Any other documents will be share? Such as study protocol, statistical analysis plan, informed consent form, clinical study report, analytic code. | study protocol, statistical analysis plan, informed consent form |
| 5                   | When will data availability begin?                                                                                                                 | 13-09-2021                                                       |
| 6                   | When will data availability end?                                                                                                                   | 13-09-2031                                                       |
| 7                   | To whom will you share the data?                                                                                                                   | Readers of the manuscript                                        |
| 8                   | For what type of analysis or purpose?                                                                                                              | Evaluation of accuracy                                           |
| 9                   | How or where can the data/ documents be obtained?                                                                                                  | By contacting the first author                                   |
| 10                  | Any other restrictions?                                                                                                                            | -                                                                |
