# Supplementary material for: Negative pressure wound therapy for massive subcutaneous emphysema: a systematic review and case series
Source: PubMed Central journal article supplement — J Thorac Dis. 2022 Jan;14(1):43–53. doi: 10.21037/jtd-21-1483 (PMC8828515; doi:10.21037/jtd-21-1483), 2022-01
Supplement: jtd-14-01-43-supplementary.pdf [file jtd-14-01-43-supplementary.pdf]

## Appendix 1 PubMed (National Library of Medicine) search strategy

| Overview            |                                                                                                                                                                |         |
|---------------------|----------------------------------------------------------------------------------------------------------------------------------------------------------------|---------|
| Database            | PubMed.gov                                                                                                                                                     |         |
| Platform            | National Library of Medicine                                                                                                                                   |         |
| Date of search      | August 10 <sup>th</sup> , 2021                                                                                                                                 |         |
| Number of results   | 15                                                                                                                                                             |         |
| Syntax              |                                                                                                                                                                |         |
| <term> (Mesh Terms) | MeSH heading                                                                                                                                                   |         |
| "<term>"            | Double quotations are used for searching two or more subsequent words.                                                                                         |         |
| (tiab)              | Words in title or abstract                                                                                                                                     |         |
| *                   | Truncation                                                                                                                                                     |         |
| AND, OR             | Boolean operator.                                                                                                                                              |         |
| Search (#)          | Query                                                                                                                                                          | Results |
| 1                   | subcutaneous emphysema(MeSH Terms)                                                                                                                             | 6,074   |
| 2                   | "subcutaneous emphysema"(tiab)                                                                                                                                 | 3,281   |
| 3                   | #1 OR #2                                                                                                                                                       | 7,859   |
| 4                   | closures, vacuum assisted(MeSH Terms)                                                                                                                          | 3,285   |
| 5                   | negative pressure dressing(MeSH Terms)                                                                                                                         | 3,285   |
| 6                   | #4 OR #5                                                                                                                                                       | 3,285   |
| 7                   | 'NPWT'(tiab) OR 'negative pressure (tiab)' OR 'VAC'(tiab) OR 'vacuum assisted closure'(tiab) OR 'blow-hol*(tiab) OR 'blow hol*(tiab)'                          | 13,411  |
| 8                   | #6 OR #7                                                                                                                                                       | 14,087  |
| 9                   | 'thora*' (tiab) OR 'thorax surg*(tiab) OR 'thorax injur*(tiab) OR 'pneumothor*(tiab) OR 'VATS'(tiab) OR 'thoracoscopy'(tiab) OR 'video-assisted thoraco*(tiab) | 243,986 |
| 10                  | #3 AND #8 AND #9                                                                                                                                               | 15      |

## Appendix 2 Embase (Elsevier) search strategy

| Overview          |                                                                                                                                                                   |         |
|-------------------|-------------------------------------------------------------------------------------------------------------------------------------------------------------------|---------|
| Database          | Embase                                                                                                                                                            |         |
| Platform          | Elsevier                                                                                                                                                          |         |
| Date of search    | August 10 <sup>th</sup> , 2021                                                                                                                                    |         |
| Number of results | 61                                                                                                                                                                |         |
| Syntax            |                                                                                                                                                                   |         |
| /exp              | Exploded indexing term (Emtree heading).                                                                                                                          |         |
| '<term>'          | Single quotations are used                                                                                                                                        |         |
| *                 | Truncation                                                                                                                                                        |         |
| :ti,ab,kw         | Terms in either Title or Abstract or Keyword fields                                                                                                               |         |
| AND, OR           | Boolean operator.                                                                                                                                                 |         |
| Search (#)        | Query                                                                                                                                                             | Results |
| 1                 | subcutaneous emphysema/exp                                                                                                                                        | 6,562   |
| 2                 | 'subcutaneous emphysema':ab,ti,kw                                                                                                                                 | 4,507   |
| 3                 | #1 OR #2                                                                                                                                                          | 7,644   |
| 4                 | vacuum/exp                                                                                                                                                        | 50,744  |
| 5                 | vacuum assisted closure/exp                                                                                                                                       | 8,875   |
| 6                 | vacuum assisted closure device/exp                                                                                                                                | 1,056   |
| 7                 | suction device/exp                                                                                                                                                | 6,176   |
| 8                 | #4 OR #5 OR #6 OR #7                                                                                                                                              | 55,587  |
| 9                 | 'vacuum assisted closure':ab,ti,kw OR 'suction devic*':ab,ti,kw OR 'vacuum':ab,ti,kw OR 'VAC':ab,ti,kw OR 'NPWT':ab,ti,kw                                         | 46,311  |
| 10                | #8 OR #9                                                                                                                                                          | 59,573  |
| 11                | thorax surgery/exp                                                                                                                                                | 671,881 |
| 12                | thorax injury/exp                                                                                                                                                 | 90,078  |
| 13                | pneumothorax/exp                                                                                                                                                  | 47,207  |
| 14                | #11 OR #12 OR #13                                                                                                                                                 | 778,099 |
| 15                | 'thorax surg*':ab,ti,kw OR 'thorax injur*':ab,ti,kw OR 'pneumothor*':ab,ti,kw OR 'VATS':ti,ab,kw OR 'thoracoscopy':ti,ab,kw OR 'Video-assisted thoraco*':ti,ab,kw | 52,918  |
| 16                | #14 OR #15                                                                                                                                                        | 788,723 |
| 17                | #3 AND #10 AND #16                                                                                                                                                | 61      |

### Appendix 3 Cochrane Library (Cochrane) search strategy

| Overview                                 |                                                                                                                                                                  |         |
|------------------------------------------|------------------------------------------------------------------------------------------------------------------------------------------------------------------|---------|
| Database                                 | Cochrane Library                                                                                                                                                 |         |
| Platform                                 | Cochrane                                                                                                                                                         |         |
| Date of search                           | August 10 <sup>th</sup> , 2021                                                                                                                                   |         |
| Number of results                        | 36                                                                                                                                                               |         |
| Syntax                                   |                                                                                                                                                                  |         |
| MeSH descriptor: ()<br>explode all trees | Exploded indexing term (Emtree heading).                                                                                                                         |         |
| '<term>'                                 | Single quotations are used                                                                                                                                       |         |
| :ti,ab,kw                                | Terms in either Title or Abstract fields or Keywords                                                                                                             |         |
| AND, OR                                  | Boolean operator                                                                                                                                                 |         |
| *                                        | Truncation                                                                                                                                                       |         |
| Search (#)                               | Query                                                                                                                                                            | Results |
| 1                                        | MeSH descriptor: (Subcutaneous Emphysema) explode all trees                                                                                                      | 89      |
| 2                                        | 'subcutaneous emphysema':ti,ab,kw                                                                                                                                | 145     |
| 3                                        | #1 OR #2                                                                                                                                                         | 231     |
| 4                                        | MeSH descriptor: (Negative-Pressure Wound Therapy) explode all trees                                                                                             | 216     |
| 5                                        | 'negative pressure wound therap*':ti,ab,kw OR 'Vacuum assisted closure':ti,ab,kw OR 'vacuum':ti,ab,kw OR 'VAC':ti,ab,kw OR 'NPWT':ti,ab,kw                       | 3,389   |
| 6                                        | #4 OR #5                                                                                                                                                         | 3,389   |
| 7                                        | MeSH descriptor: (Thoracic Surgery) explode all trees                                                                                                            | 167     |
| 8                                        | (MeSH descriptor: (Thoracic Surgical Procedures) explode all trees                                                                                               | 15,846  |
| 9                                        | MeSH descriptor: (Thoracic Surgery, Video-Assisted) explode all trees                                                                                            | 260     |
| 10                                       | MeSH descriptor: (Pneumothorax) explode all trees                                                                                                                | 354     |
| 11                                       | 'Thoracic surg*':ti,ab,kw OR 'Thoracic traum*':ti,ab,kw OR 'Pneumothor*':ti,ab,kw OR VATS:ti,ab,kw OR Thoracoscopy:ti,ab,kw OR Video-assisted thoraco*':ti,ab,kw | 14,259  |
| 12                                       | #7 OR #8 OR #9 OR #10 OR #11                                                                                                                                     | 26,819  |
| 13                                       | #3 AND # 6 AND #12                                                                                                                                               | 36      |

The results included 0 Cochrane reviews, 0 Cochrane protocols, 36 Trials and 0 Editorials.
